# Supplementary material
Source: PubMed Central journal article supplement (PMC10209827)
Supplement: jamasurg-e231201-s003.pdf [file jamasurg-e231201-s003.pdf]

## Supplemental Online Content

Goh M, Hollewand C, McBride S, Ryan N, van der Werf B, Mathy JA. Effect of microdoses of incisional antibiotics on the rate of surgical site infections in skin cancer surgery: a randomized clinical trial. *JAMA Surg*. Published online May 24, 2023. doi:10.1001/jamasurg.2023.1201

**eMethods.** Patient Questionnaire (Elicited at Each Postoperative Visit With Trial Nurse)

**eFigure.** Overlap of Patients Between Assessment (A) and Treatment (B) Groups

**eTable 1.** Lesion Distribution Across Arms

**eTable 2.** Rate of Surgical Site Infection (SSI) Based on a Postoperative Wound Infection (POWI) Score of  $\geq 5$  by Treatment Group in the Intention-to-Treat (Per Protocol) and Actual Treatment (As Treated) Populations

This supplementary material has been provided by the authors to give readers additional information about their work.

**eMethods. Patient Questionnaire (Elicited at Each Postoperative Visit With Trial Nurse)**

First Postoperative Visit:

1. Are you Immunosuppressed (e.g., for transplant, auto-immune disease, COPD on prednisone)
2. Are you Diabetic? (*i.e.*, glucose intolerant on more than dietary management; *e.g.*, NIDDM, IDDM)
3. Do you have a history of any prior SSI/Surgical Site Infection?
4. Do you smoke?

First Postoperative Visit AND all Subsequent Visits:

1. Have you experienced any side effects or adverse events since operation or last assessment?
2. Have you received antibiotics for any reason since operation or last assessment?

**eFigure.** Overlap of Patients Between Assessment (A) and Treatment (B) Groups  
\*Some patients presented more than once over the study period, and were therefore eligible for enrolment and randomization on more than one occasion; these patients could be randomized to different treatment arms at each presentation.

**A**

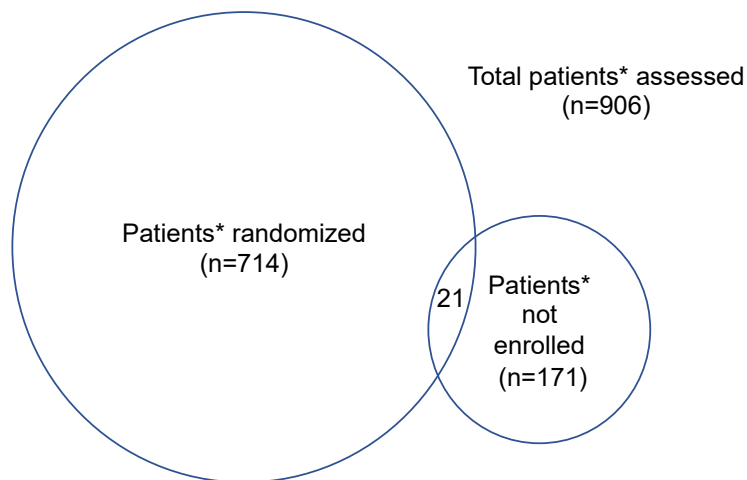

**B**

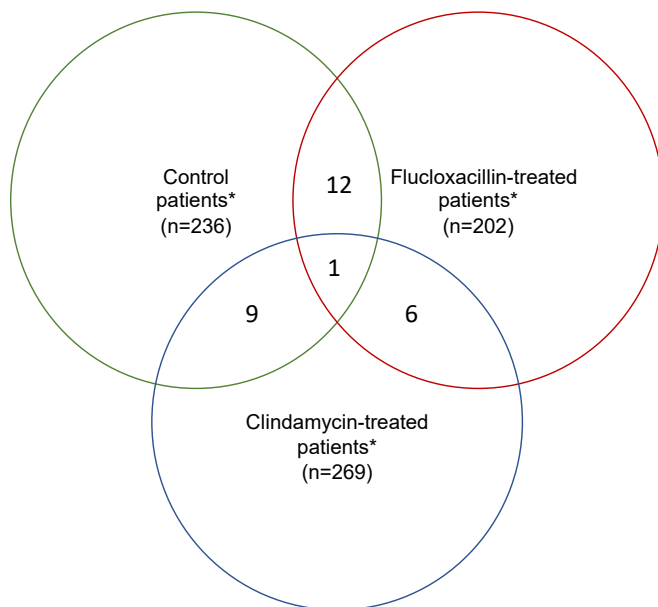

**eTable 1. Lesion Distribution Across Arms**

|                          |                | Actual Treatment |                |             |      |
|--------------------------|----------------|------------------|----------------|-------------|------|
|                          |                | Control          | Flucloxacillin | Clindamycin |      |
| Intended Treatment (ITT) | Control        | 384              | 0              | 2           | 386  |
|                          | Flucloxacillin | 4                | 322            | 0           | 326  |
|                          | Clindamycin    | 0                | 1              | 420         | 421  |
|                          |                | 388              | 323            | 422         | 1133 |

**eTable 2.** Rate of Surgical Site Infection (SSI) Based on a Postoperative Wound Infection (POWI) Score of  $\geq 5$  by Treatment Group in the Intention-to-Treat (Per Protocol) and Actual Treatment (As Treated) Populations

|                                          | <b>Control</b>       | <b>Flucloxacillin</b> | <b>p-value vs control</b> | <b>Clindamycin</b>   | <b>p-value vs control</b> | <b>p-value vs flucloxacillin</b> |
|------------------------------------------|----------------------|-----------------------|---------------------------|----------------------|---------------------------|----------------------------------|
| <b>Intention-to-treat population</b>     | <b>(386 lesions)</b> | <b>(326 lesions)</b>  |                           | <b>(421 lesions)</b> |                           |                                  |
| SSI rate, proportion of lesions (95% CI) | 5.7% (3.8–8.5%)      | 5.2% (3.3–8.2%)       | 0.777                     | 2.1% (1.1–4.1%)      | <b>0.011</b>              | <b>0.028</b>                     |
| <b>As-treated population</b>             | <b>(388 lesions)</b> | <b>(323 lesions)</b>  |                           | <b>(422 lesions)</b> |                           |                                  |
| SSI rate, proportion of lesions (95% CI) | 5.7% (3.8–8.5%)      | 5.3% (3.3–8.3%)       | 0.812                     | 2.1% (1.1–4.1%)      | <b>0.012</b>              | <b>0.026</b>                     |

CI, confidence interval.
