# Supplementary material
Source: PubMed Central journal article supplement (PMC10209827)
Supplement: jamasurg-e231201-s004.pdf [file jamasurg-e231201-s004.pdf]

## Data Sharing Statement

Goh. Effect of Microdoses of Incisional Antibiotics on the Rate of Surgical Site Infections in Skin Cancer Surgery. *JAMA Surg.* Published May 24, 2023. doi:10.1001/jamasurg.2023.1201

### Data

**Data available:** Yes

**Data types:** Deidentified participant data, Data dictionary

**How to access data:** The dataset used in this study is available from the corresponding author on reasonable request: [Jon.Mathy@middlemore.co.nz](mailto:Jon.Mathy@middlemore.co.nz)

**When available:** With publication

### Supporting Documents

**Document types:** Informed consent form, Other (please specify)

**Additional Information:** Patient Information Sheet

**How to access documents:** [Jon.Mathy@middlemore.co.nz](mailto:Jon.Mathy@middlemore.co.nz)

**When available:** With publication

### Additional Information

**Who can access the data:** researchers whose proposed use of the data has been approved

**Types of analyses:** for any reasonable request

**Mechanisms of data availability:** After approval of a proposal, with a signed data access agreement, with investigator support

**Any additional restrictions:** Ethics review prn
